# Supplementary material for: The Mechanisms of GPR55 Receptor Functional Selectivity during Apoptosis and Proliferation Regulation in Cancer Cells
Source: MDPI journal article supplement (doi:10.3390/ijms24065524), 2023-03-14
Supplement: s1 [file s1]

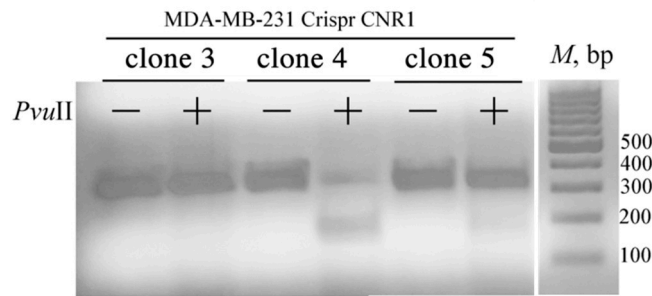

**Figure S1.** The evaluation of the CB1 receptor knockout efficiency. Electrophoresis of the *CB1* (*CNR1*) genomic DNA fragments obtained by PCR before (-) and after (+) *PvuII* restriction enzyme treatment; the disappearance of the *PvuII* cleavage would indicate the loss of the appropriate part of the gene, equaling to the successful gene modification.

```

CNR1      CAACAAGTCTCTCTCGTCCTTCAAGGAGAATGAGGAGAACATCCAGTGTGGGAGAACTT 124
3.3       CAACAAGTCTCTCTCGTCCTTCAAGGAGAATGAGGAGAACATCCAGTGTGGGAGAACTT 238
3.2       CAACAAGTCTCTCTCGTCCTTCAAGGAGAATGAGGAGAACATCCAGTGTGGGAGAACTT 238
3.4       CAACAAGTCTCTCTCGTCCTTCAAGGAGAATGAGGAGAACATCCAGTGTGGGAGAACTT 236
3.5       CAACAAGTCTCTCTCGTCCTTCAAGGAGAATGAGGAGAACATCCAGTGTGGGAGAACTT 235
3.1       CAACAAGTCTCTCTCGTCCTTCAAGGAGAATGAGGAGAACATCCAGTGTGGGAGAACTT 238
3.7       CAACAAGTCTCTCTCGTCCTTCAAGGAGAATGAGGAGAACATCCAGTGTGGGAGAACTT 236
*****

CNR1      CATGGACATAGAGTGTTCATGGTCCTGAACCCAGCCAGC-AGCTGGCCATTGCAGTCC 183
3.3       CGTGGACATAGAGTGTTCATGGTCCT----- 265
3.2       CATGGACATAGAGTGTTCATGGTCCTGAACCCAGCCAGCAAGCTGGCCATTGCAGTCC 298
3.4       CATGGACATAGAGTGTTCATGGTCCTGAACCCCA-----AGCTGGCCATTGCAGTCC 289
3.5       CATGGACATAGAGTGTTCATGGTCCTGAACCCAGCCA---AGCTGGCCATTGCAGTCC 292
3.1       CATGGACATAGAGTGTTCATGGTCCTGAACCCAGCCA---AGCTGGCCATTGCAGTCC 295
3.7       CATGGACATAGAGTGTTCATGGTCCTGAACCCAGCCA---AGCAGGCCATTGCAGTCC 293
* *****

CNR1      TGTCCCTCACGCTGGGCACCTTCACGGTCCTGGAGAACCCTCCTGGTGCTGTGCGTCATCC 243
3.3       -GTCCCTCACGCTGGGCACCTTCACGGTCCTGGAGAACCCTCCTGGTGCTGTGCGTCATCC 324
3.2       TGTCCCTCACGCTGGGCACCTTCACGGTCCTGGAGAACCCTCCTGGTGCTGTGCGTCATCC 358
3.4       TGTCCCTCACGCTGGGCACCTTCACGGTCCTGGAGAACCCTCCTGGTGCTGTGCGTCATCC 349
3.5       TGTCCCTCACGCTGGGCACCTTCACGGTCCTGGAGAACCCTCCTGGTGCTGTGCGTCATCC 352
3.1       TGTCCCTCACGCTGGGCACCTTCACGGTCCTGGAGAACCCTCCTGGTGCTGTGCGTCATCC 355
3.7       TGTCCCTCACGCTGGGCACCTTCACGGTCCTGGAGAACCCTCCTGGTGCTGTGCGTCATCC 353
*****

```

**Figure S2.** The evaluation of the CB1 receptor knockout efficiency. Sequencing results alignment with the native *CNR1* mRNA. *PvuII* cleavage site is shown in bold.

```

cnr2      TCCTGCTGAAGATTGGCAGCGTGAATGACCTTCACAGCCTCTGTGGGTAGCCTCCTGC 65
2e5       TCCTGCTGAAGATTGGCAGCGTGAATGACCTTCACAGCCTCTGTGGGTAGCCTCCTGC 179
1h9       TCCT - CTGAAGATTGGCAGCGTGAATGACCTTCACAGCCTCTGTGGGTAGCCTCCTGC 176
1h6       TCCTGCTGAAGATTGGCAGCGTGAATGACCTTCACAGCCTCTGTGGGTAGCCTCCTGC 176
2f1       TCCTGCTGAAGATTGGCAGCGTGAATGACCTTCACAGCCTCTGTGGGTAGCCTCCTGC 178
1b10      TCCTGCTGAAGATTGGCAGCGTGAATGACCTTCACAGCCTCTGTGGGTAGCCTCCTGC 179
1b3       TCCTGCTGAAGATTGGCAGCGTGAATGACCTTCACAGCCTCTGTGGGTAGCCTCCTGC 179
**** *****

cnr2      TGACCGCCATTGACCGATACCTCTGCCTGCGCTATCCACCTTCCTACAAAGCTCTGCTCA 125
2e5       TGACCGCCATTGACCGATACCTCTGCCTGCGCTATCCACCTTCCTACAAAGCTCTGCTCA 239
1h9       TGACCGCCATTGACCGATACCTCTGCCTGCGCTATCCACCTTCCTACAAAGCTCTGCTCA 236
1h6       TGACCGCCATTGACCGATACCTCTGCCTGCGCTATCCACCTTCCTACAAAGCTCTGCTCA 236
2f1       TGACCGCCATTGACCGATACCTCTGCCTGCGCTATCCACCTTCCTACAAAGCTCTGCTCA 238
1b10      TGACCGCCATTGACCGATACCTCTGCCTGCGCTATCCACCTTCCTACAAAGCTCTGCTCA 239
1b3       TGACCGCCATTGACCGATACCTCTGCCTGCGCTATCCACCTTCCTACAAAGCTCTGCTCA 239
*****

cnr2      CCCGTGGAAGGGCACTGGTGACCCCTGGGCATCATGTGGGTCCTCTCAGCACTAGTCTCCT 185
2e5       CCCGTGGAAGGGCACTGGTGAC-CTGGGCATCATGTGGGTCCTCTCAGCACTAGTCTCCT 298
1h9       CCCGTGGAAGGGCACTGG- --CCCTGGGTATCATGTGGGTCCTCTCAGCACTAGTCTCCT 293
1h6       CCCGTGGAAGGGCACTGGTGAC-CTGGGCATCATGTGGGTCCTCTCAGCACTAGTCTCCT 295
2f1       CCCGTGGAAGGGCACTGGTGAC-CTGGGCATCATGTGGGTCCTCTCAGCACTAGTCTCCT 297
1b10      CCCGTGGAAGGGCACTGGTGAC-CTGGGCATCATGTGGGTCCTCTCAGCACTAGTCTCCT 298
1b3       CCCGTGGAAGGGCACTGGTGAC-CTGGGCATCATGTGGGTCCTCTCAGCACTAGTCTCCT 298
*****

```

**Figure S3A.** The evaluation of the CB2 receptor knockout efficiency. Sequencing results alignment with the native *CNR2* mRNA. *PasI* cleavage site is shown in bold.

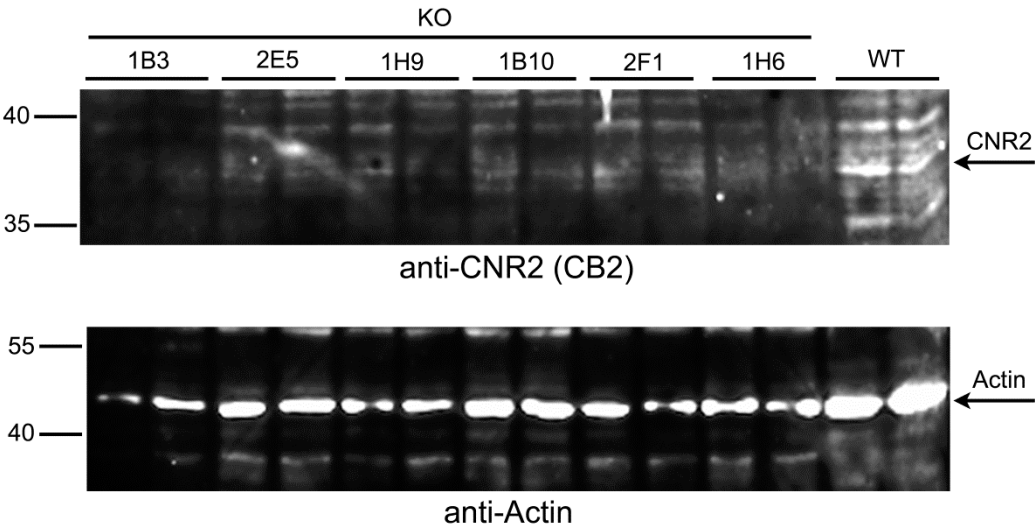

**Figure S3B.** The evaluation of the CB2 receptor knockout efficiency. Western blot data.

|       |                                                                       |       |
|-------|-----------------------------------------------------------------------|-------|
| GPR55 | GCATCCCTATCTACAGTTT <b>CCATGGG</b> AAAGTGGAAAAATACATGTGCTTCCACAACATGT | 231   |
| 1B4   | GCATCCCTATCTACAGTTTC---GGGAAAGTGGAAAAATACATGTGCTTCCACAACATGT          | 295   |
| C12   | GCATCCCTATCTACAGTTTC--TGGGAAAGTGGAAAAATACATGTGCTTCCACAACATGT          | 298   |
| F10   | GCATCCCTATCTA-----AGTGGAAAAATACATGTGCTTCCACAACATGT                    | 296   |
|       | *****                                                                 | ***** |

**Figure S4A.** The evaluation of the GPR55 receptor knockout efficiency. Sequencing results alignment with the native *GPR55* mRNA. *NcoI* cleavage site is shown in bold.

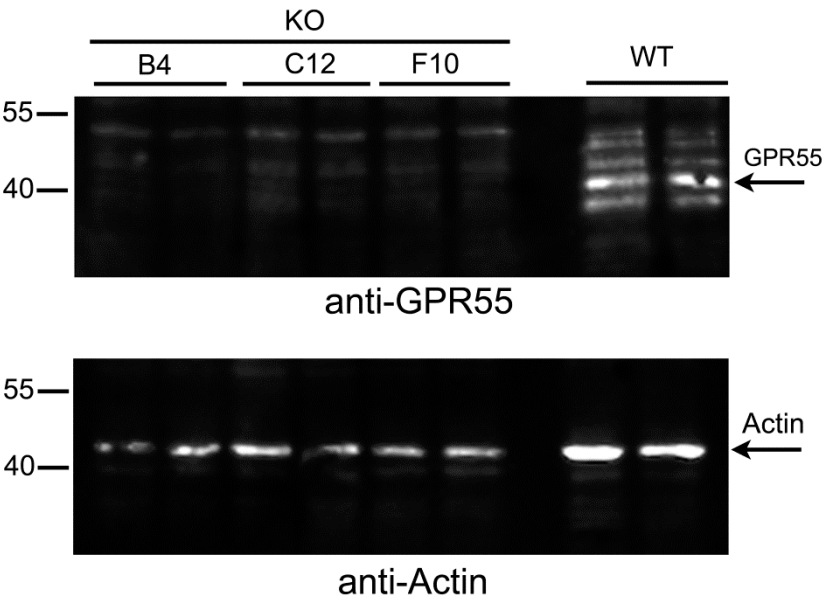

**Figure S4B.** The evaluation of the GPR55 receptor knockout efficiency. Western blot data.

|       |                                                                         |     |
|-------|-------------------------------------------------------------------------|-----|
| GPR18 | CATTGCTTTATGGCTTCTTGCCTTTATTAGTGTGCTGACAGATACATGGCCATT <b>TGTACAGCC</b> | 189 |
| 1f2   | CATTGCTTTATGGCTTCTTGCCTTTATTAGTGTGCTGACAGATACATGGCCATT-TACTGCC          | 299 |
| 2d9   | CATTGCTTTATGGCTTCTTGCCTTTGTTAGTGTGCTGACAGATACATGGCCATT-TACAGCC          | 299 |
| 1h7   | CATTGCTTTATGGCTTCTTGCCTTTATTAGTGTGCTGACAGATACATGGCCATT-TACAGCC          | 298 |
| 2b9   | CATTGCTTTATGGCTTCTTGCCTTTATTAGTGTGCTGACAGATACATGGCCATT-TACAGCC          | 298 |
|       | *****                                                                   | *** |

**Figure S5.** The evaluation of the GPR18 receptor knockout efficiency. Sequencing results alignment with the native *GPR18* mRNA. *BstAUI* cleavage site is shown in bold.
